# Supplementary material for: A Novel Nutritional Index Serves as A Useful Prognostic Indicator in Cardiac Critical Patients Requiring Mechanical Circulatory Support
Source: PubMed Central journal article supplement (PMC6627834; doi:10.3390/nu11061420), 2019-06-24
Supplement: nutrients-11-01420-s001.pdf [file nutrients-11-01420-s001.pdf]

**Supplementary Table 1:** Unadjusted univariate Cox proportional hazard analyses for all-cause (a) and cardiovascular (b) mortality

| a All-cause mortality                  |             |             |             |                    |
|----------------------------------------|-------------|-------------|-------------|--------------------|
|                                        | HR          | 95.0% CI    |             | P                  |
| <b>lower sBP &lt;102 mmHg (median)</b> | <b>2.66</b> | <b>1.71</b> | <b>4.13</b> | <b>&lt;0.0001</b>  |
| <b>1SD higher sBP</b>                  | <b>0.56</b> | <b>0.44</b> | <b>0.70</b> | <b>&lt;0.0001</b>  |
| Higher heart rate >86 bpm (median)     | 1.06        | 0.73        | 1.55        | 0.755              |
| <b>Concomittant use of VA-ECMO</b>     | <b>5.55</b> | <b>3.80</b> | <b>8.12</b> | <b>&lt;0.0001</b>  |
| Diabetes                               | 0.91        | 0.60        | 1.40        | 0.68               |
| <b>Stage 3-5 CKD</b>                   | <b>3.29</b> | <b>2.12</b> | <b>5.10</b> | <b>&lt;0.0001</b>  |
| <b>1SD higher eGFR</b>                 | <b>0.59</b> | <b>0.48</b> | <b>0.72</b> | <b>&lt;0.0001</b>  |
| <b>Acute coronary syndrome</b>         | <b>0.51</b> | <b>0.35</b> | <b>0.74</b> | <b>&lt;0.0001</b>  |
| <b>Cardiogenic shock</b>               | <b>2.14</b> | <b>1.18</b> | <b>3.91</b> | <b>0.013</b>       |
| Congestive heart failure               | 1.24        | 0.66        | 2.30        | 0.507              |
| <b>GNRI-T3</b>                         | <b>0.35</b> | <b>0.20</b> | <b>0.60</b> | <b>&lt;0.0001</b>  |
| <b>TCBI-T3</b>                         | <b>0.23</b> | <b>0.12</b> | <b>0.45</b> | <b>&lt;0.0001</b>  |
| <b>1SD higher GNRI</b>                 | <b>0.58</b> | <b>0.49</b> | <b>0.69</b> | <b>0&lt;0.0001</b> |
| <b>1SD higher TCBI</b>                 | <b>0.29</b> | <b>0.15</b> | <b>0.59</b> | <b>0.001</b>       |
| b Cardiovascular mortality             |             |             |             |                    |
|                                        | HR          | 95.0% CI    |             | P                  |
| <b>lower sBP &lt;102 mmHg (median)</b> | <b>3.32</b> | <b>2.05</b> | <b>5.37</b> | <b>&lt;0.0001</b>  |
| <b>1SD higher sBP*</b>                 | <b>0.51</b> | <b>0.40</b> | <b>0.64</b> | <b>&lt;0.0001</b>  |

|                                    |             |             |             |                   |
|------------------------------------|-------------|-------------|-------------|-------------------|
| Higher heart rate >86 bpm (median) | 1.04        | 0.70        | 1.55        | 0.843             |
| <b>Concomittant use of VA-ECMO</b> | <b>5.90</b> | <b>3.98</b> | <b>8.75</b> | <b>&lt;0.0001</b> |
| Diabetes                           | 1.01        | 0.66        | 1.56        | 0.954             |
| <b>Stage 3-5 CKD</b>               | <b>3.44</b> | <b>2.16</b> | <b>5.47</b> | <b>&lt;0.0001</b> |
| <b>1SD higher eGFR</b>             | <b>0.59</b> | <b>0.48</b> | <b>0.73</b> | <b>&lt;0.0001</b> |
| ACS                                | 0.53        | 0.36        | 0.78        | 0.001             |
| <b>Cardiogenic shock</b>           | <b>2.09</b> | <b>1.12</b> | <b>3.91</b> | <b>0.021</b>      |
| Congestive heart failure           | 0.96        | 0.47        | 1.98        | 0.92              |
| <b>GNRI-T3</b>                     | <b>0.38</b> | <b>0.22</b> | <b>0.65</b> | <b>&lt;0.0001</b> |
| <b>TCBI-T3</b>                     | <b>0.23</b> | <b>0.11</b> | <b>0.45</b> | <b>&lt;0.0001</b> |
| <b>1SD higher GNRI</b>             | <b>0.59</b> | <b>0.50</b> | <b>0.71</b> | <b>&lt;0.0001</b> |
| <b>1SD higher TCBI</b>             | <b>0.29</b> | <b>0.14</b> | <b>0.60</b> | <b>0.001</b>      |

**Supplementary Table 2:** Adjusted multivariate Cox proportional hazard analysis for all-cause mortality of age, TCBI and markers of organ function

|                                                 | HR          | 95% CI           | p-value      |
|-------------------------------------------------|-------------|------------------|--------------|
| Age, 1 year older                               | 1.00        | 0.97-1.03        | 0.86         |
| <b>TCBI, 1SD higher</b>                         | <b>0.29</b> | <b>0.10-0.81</b> | <b>0.02</b>  |
| BNP, 100 pg/ml higher                           | 0.96        | 0.86-1.07        | 0.44         |
| <b>eGFR, 10 ml/min/1.73m<sup>2</sup> higher</b> | <b>0.82</b> | <b>0.73-0.93</b> | <b>0.001</b> |
| <b>Total bilirubin, 1 mg/dl higher</b>          | <b>1.81</b> | <b>1.11-2.95</b> | <b>0.02</b>  |

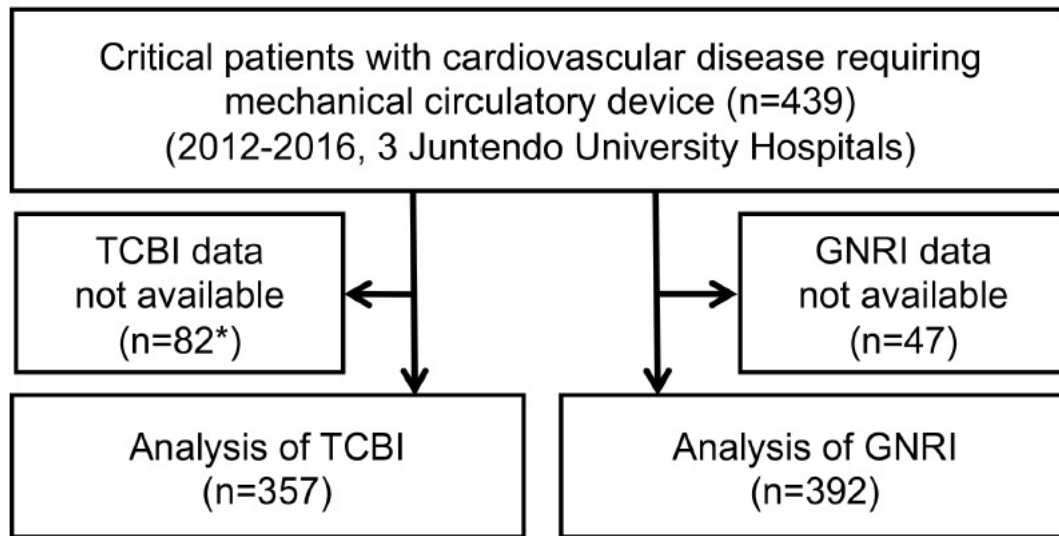

**Supplementary Figure 1: Levels of nutritional indices in patients who required MCS devices and with stable CAD**

GNRI and TCBI in patients who required MCS devices and with stable CAD. Patients in the MCS group were further divided into two groups, ACS (-) and (+). \*\*:  $p < 0.001$ , \*\*\*:  $p < 0.0001$ .

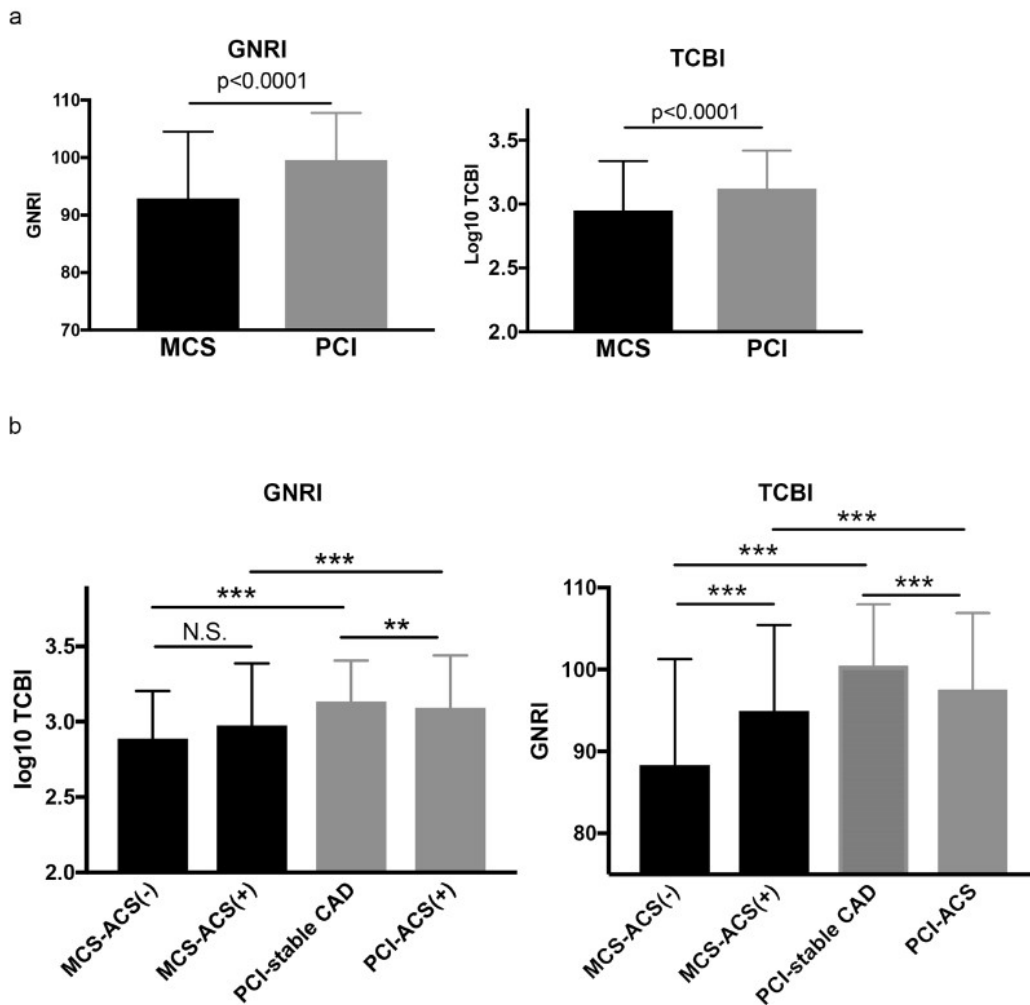

**Supplementary Figure 2: Higher GNRI was associated with reduced risk of all-cause and cardiovascular mortalities**

Kaplan-Meier analysis and log-rank comparisons to assess cumulative incidence rates of both all-cause (left panel) and cardiovascular (right panel) mortality in accordance with tertile of GNRI. \*<0.05, \*\*<0.01, \*\*\*<0.001 in log-rank comparison vs. TCBI-T1 and ¶<0.05, ¶¶<0.01, ¶¶¶<0.001 vs. TCBI-2.

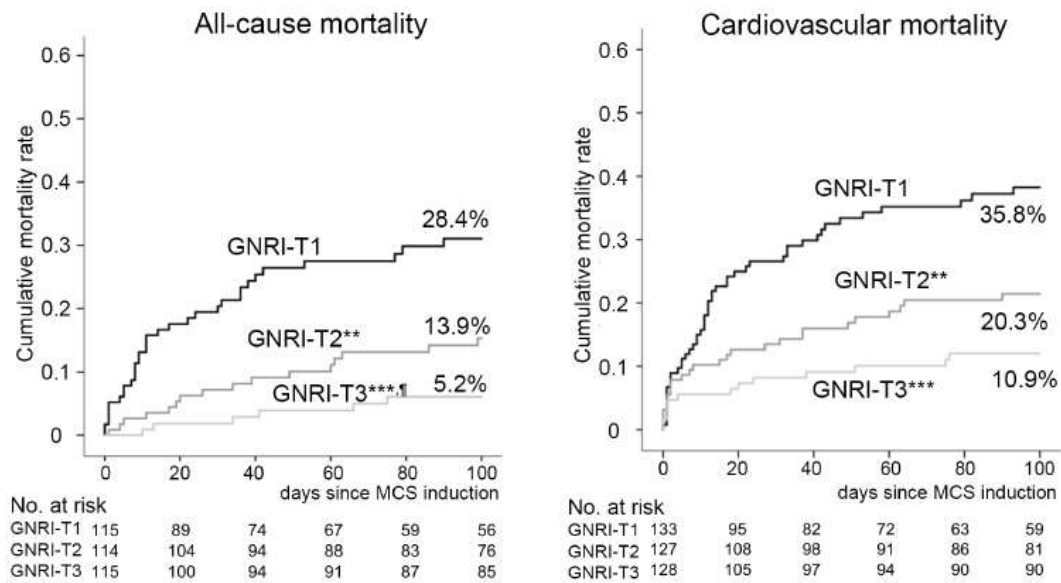

**Supplementary Figure 3: Adjusted hazard ratios for cardiovascular mortality of high TCBI and GNRI**

Forest plots of higher GNRI and TCBI as a nominal variable (highest tertile, T3, upper panel) and continuous variable (1 standard deviation (SD) higher, lower panel) for cardiovascular mortality. HR: hazard ratio, CI: confidence interval, P: p-value.
